# Supplementary material for: Composition and Specialization of the Lichen Functional Traits in a Primeval Forest—Does Ecosystem Organization Level Matter?
Source: MDPI journal article supplement (doi:10.3390/f12040485), 2021-04-15
Supplement: s1 [file s1]

# Supplementary Materials

**Table S1.** List of species recorded in the study area with their functional traits.

| Species                                                         | Thallus Type | Photobiont Type               | Asexual Reproduction of Both Bionts | Ascomata Type | Asexual Reproduction of Mycobiont | Ascomata Texture and Pigmentation                          | Spores Dark Pigmentation | Spore Septation     | Secondary Metabolites |
|-----------------------------------------------------------------|--------------|-------------------------------|-------------------------------------|---------------|-----------------------------------|------------------------------------------------------------|--------------------------|---------------------|-----------------------|
| <i>Absconditella delutula</i> (Nyl.) Coppins & H. Kilius        | crustose     | chlorococcoid and other green | absent                              | Lecidea       | absent                            | ascomata without carbonized structures                     | spores not pigmented     | spores 2-celled     | no substances         |
| <i>Absconditella lignicola</i> Vězda & Pišút                    | crustose     | chlorococcoid and other green | absent                              | Lecidea       | absent                            | ascomata without carbonized structures                     | spores not pigmented     | spores multi-celled | no substances         |
| <i>Acrocordia gemmata</i> (Ach.) A. Massal.                     | crustose     | trentepohlia                  | absent                              | perithecia    | pycnidia                          | ascomata with carbonized structures                        | spores not pigmented     | spores 2-celled     | no substances         |
| <i>Alyxoria culmigena</i> (Lib.) Ertz                           | crustose     | trentepohlia                  | absent                              | lirella       | pycnidia                          | ascomata with carbonized structures                        | spores not pigmented     | spores multi-celled | no substances         |
| <i>Alyxoria varia</i> (Pers.) Ertz & Tehler                     | crustose     | trentepohlia                  | absent                              | lirella       | pycnidia                          | ascomata with carbonized structures + ascomata with pruina | spores not pigmented     | spores multi-celled | no substances         |
| <i>Amandinea punctata</i> (Hoffm.) Coppins & Scheid.            | crustose     | chlorococcoid and other green | absent                              | Lecidea       | pycnidia                          | ascomata with carbonized structures                        | spores pigmented         | spores 2-celled     | no substances         |
| <i>Anaptychia ciliaris</i> (L.) Körb.                           | fruticose    | chlorococcoid and other green | absent                              | Lecanora      | pycnidia                          | ascomata with carbonized structures + ascomata with pruina | spores pigmented         | spores 2-celled     | no substances         |
| <i>Anisomeridium biforme</i> (Borrer) R. C. Harris              | crustose     | trentepohlia                  | absent                              | perithecia    | pycnidia                          | ascomata with carbonized structures                        | spores not pigmented     | spores 2-celled     | no substances         |
| <i>Anisomeridium polyperi</i> (M. B. Ellis & Everh.) M. E. Barr | crustose     | trentepohlia                  | absent                              | perithecia    | pycnidia                          | ascomata with carbonized structures                        | spores not pigmented     | spores multi-celled | no substances         |
| <i>Arthonia arthonioides</i> (Ach.) A.L. Sm.                    | crustose     | trentepohlia                  | absent                              | arthonia      | absent                            | ascomata with carbonized structures                        | spores not pigmented     | spores multi-celled | no substances         |
| <i>Arthonia atra</i> (Pers.) A. Schneid                         | crustose     | trentepohlia                  | absent                              | arthonia      | absent                            | ascomata with carbonized structures                        | spores not pigmented     | spores multi-celled | no substances         |
| <i>Arthonia didyma</i> Körb.                                    | crustose     | trentepohlia                  | absent                              | arthonia      | absent                            | ascomata without carbonized structures                     | spores not pigmented     | spores 2-celled     | no substances         |
| <i>Arthonia mediella</i> Nyl.                                   | crustose     | chlorococcoid and other green | absent                              | arthonia      | absent                            | ascomata with carbonized structures                        | spores not pigmented     | spores multi-celled | no substances         |
| <i>Arthonia radiata</i> (Pers.) Ach.                            | crustose     | trentepohlia                  | absent                              | arthonia      | absent                            | ascomata with carbonized structures                        | spores not pigmented     | spores multi-celled | no substances         |
| <i>Arthonia spadicea</i> Leight.                                | crustose     | trentepohlia                  | absent                              | arthonia      | pycnidia                          | ascomata without carbonized structures                     | spores not pigmented     | spores 2-celled     | no substances         |
| <i>Arthonia vinosa</i> Leight.                                  | crustose     | trentepohlia                  | absent                              | arthonia      | pycnidia                          | ascomata without carbonized structures                     | spores not pigmented     | spores 2-celled     | antraquinoses         |
| <i>Arthothelium ruanum</i> (A. Massal.) Körb.                   | crustose     | trentepohlia                  | absent                              | arthonia      | pycnidia                          | ascomata with carbonized structures                        | spores pigmented         | spores muriform     | no substances         |
| <i>Arthothelium spectabile</i> A. Massal.                       | crustose     | trentepohlia                  | absent                              | arthonia      | absent                            | ascomata with carbonized structures                        | spores pigmented         | spores muriform     | no substances         |
| <i>Athalia pyracea</i> (Ach.) Arup, Frödén & Søchting           | crustose     | chlorococcoid and other green | absent                              | Lecanora      | pycnidia                          | ascomata without carbonized structures                     | spores not pigmented     | spores 2-celled     | antraquinoses         |

|                                                                  |          |                                  |         |         |          |                                           |                         |                         |                                           |
|------------------------------------------------------------------|----------|----------------------------------|---------|---------|----------|-------------------------------------------|-------------------------|-------------------------|-------------------------------------------|
| <i>Bacidia albogranulosa</i> Malíček,<br>Palice, Vondrák & Kukwa | crustose | chlorococcoid<br>and other green | soredia | absent  | absent   | absent                                    | absent                  | absent                  | β-orcinol depsides                        |
| <i>Bacidia arceutina</i> (Ach.) Arnold                           | crustose | chlorococcoid<br>and other green | absent  | Lecidea | pycnidia | ascomata without carbonized<br>structures | spores not<br>pigmented | spores multi-<br>celled | no substances                             |
| <i>Bacidia auerswaldii</i> (Hepp ex<br>Stizenb.) Mig             | crustose | chlorococcoid<br>and other green | absent  | Lecidea | absent   | ascomata without carbonized<br>structures | spores not<br>pigmented | spores multi-<br>celled | no substances                             |
| <i>Bacidia biatorina</i> (Körb.) Vain.                           | crustose | chlorococcoid<br>and other green | absent  | Lecidea | pycnidia | ascomata without carbonized<br>structures | spores not<br>pigmented | spores multi-<br>celled | no substances                             |
| <i>Bacidia brandii</i> Coppins & Van den<br>Boom                 | crustose | chlorococcoid<br>and other green | absent  | Lecidea | pycnidia | ascomata without carbonized<br>structures | spores not<br>pigmented | spores multi-<br>celled | no substances                             |
| <i>Bacidia circumspecta</i> (Norrl. & Nyl.)<br>Malme             | crustose | chlorococcoid<br>and other green | absent  | Lecidea | pycnidia | ascomata without carbonized<br>structures | spores not<br>pigmented | spores multi-<br>celled | no substances                             |
| <i>Bacidia laurocerasi</i> (Delise ex Duby)<br>Zahlbr.           | crustose | chlorococcoid<br>and other green | absent  | Lecidea | pycnidia | ascomata without carbonized<br>structures | spores not<br>pigmented | spores multi-<br>celled | no substances                             |
| <i>Bacidia rubella</i> (Hoffm.) A. Massal.                       | crustose | chlorococcoid<br>and other green | absent  | Lecidea | pycnidia | ascomata without carbonized<br>structures | spores not<br>pigmented | spores multi-<br>celled | no substances                             |
| <i>Bacidia subincompta</i> (Nyl.) Arnold                         | crustose | chlorococcoid<br>and other green | absent  | Lecidea | pycnidia | ascomata without carbonized<br>structures | spores not<br>pigmented | spores multi-<br>celled | no substances                             |
| <i>Bacidina mendax</i> Czarnota & Guz.-<br>Krzem.                | crustose | chlorococcoid<br>and other green | absent  | Lecidea | pycnidia | ascomata without carbonized<br>structures | spores not<br>pigmented | spores multi-<br>celled | no substances                             |
| <i>Bacidina phacodes</i> (Körb.) Vězda                           | crustose | chlorococcoid<br>and other green | absent  | Lecidea | pycnidia | ascomata without carbonized<br>structures | spores not<br>pigmented | spores multi-<br>celled | no substances                             |
| <i>Bacidina sulphurella</i> (Samp.) M.<br>Hauck & V. Wirth       | crustose | chlorococcoid<br>and other green | isidia  | Lecidea | pycnidia | ascomata without carbonized<br>structures | spores not<br>pigmented | spores multi-<br>celled | no substances                             |
| <i>Bactrospora dryina</i> (Ach.) A. Massal.                      | crustose | trentepohlia                     | absent  | Lecidea | pycnidia | ascomata without carbonized<br>structures | spores not<br>pigmented | spores multi-<br>celled | no substances                             |
| <i>Biatora albohyalina</i> (Nyl.) Bagl. &<br>Caresti             | crustose | chlorococcoid<br>and other green | absent  | Lecidea | pycnidia | ascomata without carbonized<br>structures | spores not<br>pigmented | spores 2-celled         | no substances                             |
| <i>Biatora chrysanthia</i> (Zahlbr.) Printzen                    | crustose | chlorococcoid<br>and other green | soredia | absent  | absent   | absent                                    | absent                  | absent                  | orcinol tridepsides                       |
| <i>Biatora efflorescens</i> (Hedl.) Erichsen                     | crustose | chlorococcoid<br>and other green | soredia | absent  | absent   | absent                                    | absent                  | absent                  | β-orcinol depsidones                      |
| <i>Biatora globulosa</i> (Flörke) Fr.                            | crustose | chlorococcoid<br>and other green | absent  | Lecidea | absent   | ascomata without carbonized<br>structures | spores not<br>pigmented | spores 2-celled         | no substances                             |
| <i>Biatora helvola</i> Körb. ex Hellb.                           | crustose | chlorococcoid<br>and other green | absent  | Lecidea | absent   | ascomata without carbonized<br>structures | spores not<br>pigmented | spores 1-celled         | orcinol depsides + orcinol<br>tridepsides |
| <i>Biatora hemipolia</i> (Nylander) S.<br>Ekman & Printzen       | crustose | chlorococcoid<br>and other green | absent  | Lecidea | pycnidia | ascomata without carbonized<br>structures | spores not<br>pigmented | spores multi-<br>celled | no substances                             |
| <i>Biatora hemipolia</i> f. <i>pallida</i> Czarnota<br>& Coppins | crustose | chlorococcoid<br>and other green | absent  | Lecidea | pycnidia | ascomata without carbonized<br>structures | spores not<br>pigmented | spores multi-<br>celled | no substances                             |
| <i>Biatora ligni-mollis</i> T. Sprib. &<br>Printzen              | crustose | chlorococcoid<br>and other green | absent  | Lecidea | pycnidia | ascomata without carbonized<br>structures | spores not<br>pigmented | spores multi-<br>celled | no substances                             |
| <i>Biatora mendax</i> Anzi                                       | crustose | chlorococcoid<br>and other green | absent  | Lecidea | pycnidia | ascomata without carbonized<br>structures | spores not<br>pigmented | spores 1-celled         | β-orcinol depsidones                      |
| <i>Biatora ocelliformis</i> (Nyl.) Arnold                        | crustose | chlorococcoid<br>and other green | absent  | Lecidea | pycnidia | ascomata without carbonized<br>structures | spores not<br>pigmented | spores 1-celled         | β-orcinol depsidones                      |
| <i>Biatora pontica</i> Printzen and Tønsberg                     | crustose | chlorococcoid<br>and other green | soredia | absent  | absent   | absent                                    | absent                  | absent                  | xanthones                                 |
| <i>Biatoridium monasteriense</i> J. Lahm.                        | crustose | chlorococcoid                    | absent  | Lecidea | absent   | ascomata without carbonized               | spores not              | spores 1-celled         | no substances                             |



|                                                               |          |                               |         |         |        |                                                            |                  |                 |                           |
|---------------------------------------------------------------|----------|-------------------------------|---------|---------|--------|------------------------------------------------------------|------------------|-----------------|---------------------------|
| <i>Cetrelia chicitae</i> (W.L. Culb.) W.L. Culb. & C.F. Culb. | foliose  | chlorococcoid and other green | soredia | absent  | absent | absent                                                     | absent           | absent          | orcinol depsidones        |
| <i>Cetrelia monachorum</i> (Zahlbr.) W.L.Culb. & C.F.Culb.    | foliose  | chlorococcoid and other green | soredia | absent  | absent | absent                                                     | absent           | absent          | orcinol depsides          |
| <i>Cetrelia olivetorum</i> (Nyl.) W. L. Culb. & C. F. Culb.   | foliose  | chlorococcoid and other green | soredia | absent  | absent | absent                                                     | absent           | absent          | orcinol depsides          |
| <i>Chaenotheca brachypoda</i> (Ach.) Tibell                   | crustose | chlorococcoid and other green | absent  | stalked | absent | ascomata with carbonized structures + ascomata with pruina | spores pigmented | spores 1-celled | pulvinic acid derivatives |
| <i>Chaenotheca brunneola</i> (Ach.) Müll. Arg.                | crustose | chlorococcoid and other green | absent  | stalked | absent | ascomata with carbonized structures                        | spores pigmented | spores 1-celled | $\beta$ -orcinol depsides |
| <i>Chaenotheca chlorella</i> (Ach.) Müll. Arg.                | crustose | chlorococcoid and other green | absent  | stalked | absent | ascomata with carbonized structures + ascomata with pruina | spores pigmented | spores 1-celled | pulvinic acid derivatives |
| <i>Chaenotheca chrysocephala</i> (Ach.) Th. Fr.               | crustose | chlorococcoid and other green | absent  | stalked | absent | ascomata with carbonized structures + ascomata with pruina | spores pigmented | spores 1-celled | pulvinic acid derivatives |
| <i>Chaenotheca ferruginea</i> (Sm.) Mig.                      | crustose | chlorococcoid and other green | absent  | stalked | absent | ascomata with carbonized structures                        | spores pigmented | spores 1-celled | antraquinoses             |
| <i>Chaenotheca furfuracea</i> (L.) Tibell                     | leprose  | chlorococcoid and other green | absent  | stalked | absent | ascomata with carbonized structures + ascomata with pruina | spores pigmented | spores 1-celled | pulvinic acid derivatives |
| <i>Chaenotheca gracilenta</i> (Ach.) Mattsson & Middelb.      | leprose  | chlorococcoid and other green | absent  | stalked | absent | ascomata with carbonized structures + ascomata with pruina | spores pigmented | spores 1-celled | other substances          |
| <i>Chaenotheca laevigata</i> Nádv.                            | crustose | chlorococcoid and other green | absent  | stalked | absent | ascomata with carbonized structures + ascomata with pruina | spores pigmented | spores 1-celled | pulvinic acid derivatives |
| <i>Chaenotheca phaeocephala</i> (Turner) Th. Fr.              | crustose | chlorococcoid and other green | absent  | stalked | absent | ascomata with carbonized structures + ascomata with pruina | spores pigmented | spores 1-celled | pulvinic acid derivatives |
| <i>Chaenotheca stemonea</i> (Ach.) Müll. Arg.                 | leprose  | chlorococcoid and other green | absent  | stalked | absent | ascomata with carbonized structures + ascomata with pruina | spores pigmented | spores 1-celled | $\beta$ -orcinol depsides |
| <i>Chaenotheca trichialis</i> (Ach.) Th. Fr.                  | crustose | chlorococcoid and other green | absent  | stalked | absent | ascomata with carbonized structures + ascomata with pruina | spores pigmented | spores 1-celled | other substances          |
| <i>Chaenotheca xyloxena</i> Nádv.                             | crustose | chlorococcoid and other green | absent  | stalked | absent | ascomata with carbonized structures + ascomata with pruina | spores pigmented | spores 1-celled | no substances             |
| <i>Chaenothecopsis nigra</i> Tibell                           | crustose | algae absent                  | absent  | stalked | absent | ascomata with carbonized structures                        | spores pigmented | spores 2-celled | no substances             |
| <i>Chaenothecopsis pusilla</i> (Ach.) A. F. W. Schmidt        | crustose | algae absent                  | absent  | stalked | absent | ascomata with carbonized structures                        | spores pigmented | spores 2-celled | no substances             |
| <i>Chaenothecopsis pusiola</i> (Ach.) Vain.                   | crustose | algae absent                  | absent  | stalked | absent | ascomata with carbonized structures                        | spores pigmented | spores 2-celled | no substances             |
| <i>Chaenothecopsis rubescens</i> Vain.                        | crustose | algae absent                  | absent  | stalked | absent | ascomata with carbonized structures + ascomata with pruina | spores pigmented | spores 1-celled | no substances             |

|                                                                              |           |                               |         |         |             |                                        |                      |                 |                                                                                      |
|------------------------------------------------------------------------------|-----------|-------------------------------|---------|---------|-------------|----------------------------------------|----------------------|-----------------|--------------------------------------------------------------------------------------|
| <i>Chaenothecopsis savonica</i> (Räsänen) Tibell                             | crustose  | algae absent                  | absent  | stalked | absent      | ascomata with carbonized structures    | spores pigmented     | spores 1-celled | no substances                                                                        |
| <i>Cheiromycina petri</i> D. Hawksw. & Poelt                                 | crustose  | chlorococcoid and other green | absent  | absent  | sporodochia | absent                                 | absent               | absent          | no substances                                                                        |
| <i>Cheiromycina reimeri</i> Printzen                                         | crustose  | chlorococcoid and other green | absent  | absent  | sporodochia | absent                                 | absent               | absent          | no substances                                                                        |
| <i>Chrysothrix candelaris</i> (L.) J. R. Laundon                             | leprose   | chlorococcoid and other green | soredia | absent  | absent      | absent                                 | absent               | absent          | pulvinic acid derivatives                                                            |
| <i>Chrysothrix flavovirens</i> Tønsb.                                        | leprose   | chlorococcoid and other green | soredia | absent  | absent      | absent                                 | absent               | absent          | pulvinic acid derivatives                                                            |
| <i>Cladonia arbuscula</i> (Wallr.) Flot. subsp. <i>beringiana</i>            | fruticose | chlorococcoid and other green | absent  | absent  | pycnidia    | absent                                 | absent               | absent          | $\beta$ -orcinol depsidones + usnic acid derivatives                                 |
| <i>Cladonia arbuscula</i> (Wallr.) Flot. subsp. <i>mitis</i> (Sandst.) Ruoss | fruticose | chlorococcoid and other green | absent  | absent  | pycnidia    | absent                                 | absent               | absent          | aliphatic acids + $\beta$ -orcinol depsidones + usnic acid derivatives               |
| <i>Cladonia botrytes</i> (K. G. Hagen) Willd.                                | fruticose | chlorococcoid and other green | absent  | Lecidea | pycnidia    | ascomata without carbonized structures | spores not pigmented | spores 1-celled | $\beta$ -orcinol depsides + usnic acid derivatives                                   |
| <i>Cladonia caespiticia</i> (Pers.) Flörke                                   | fruticose | chlorococcoid and other green | absent  | Lecidea | pycnidia    | ascomata without carbonized structures | spores not pigmented | spores 1-celled | $\beta$ -orcinol depsidones                                                          |
| <i>Cladonia cenotea</i> (Ach.) Schaer.                                       | fruticose | chlorococcoid and other green | soredia | absent  | absent      | absent                                 | absent               | absent          | $\beta$ -orcinol depsides                                                            |
| <i>Cladonia chlorophaea</i> (Flörke ex Sammerf.) Spreng. s.str.              | fruticose | chlorococcoid and other green | soredia | absent  | pycnidia    | absent                                 | absent               | absent          | $\beta$ -orcinol depsidones                                                          |
| <i>Cladonia coniocraea</i> (Flörke) Spreng.                                  | fruticose | chlorococcoid and other green | soredia | Lecidea | pycnidia    | ascomata without carbonized structures | spores not pigmented | spores 1-celled | $\beta$ -orcinol depsidones                                                          |
| <i>Cladonia cornuta</i> (L.) Hoffm.                                          | fruticose | chlorococcoid and other green | soredia | absent  | absent      | absent                                 | absent               | absent          | $\beta$ -orcinol depsidones                                                          |
| <i>Cladonia crispata</i> (Ach.) Flot.                                        | fruticose | chlorococcoid and other green | absent  | absent  | absent      | absent                                 | absent               | absent          | $\beta$ -orcinol depsides                                                            |
| <i>Cladonia deformis</i> (L.) Hoffm.                                         | fruticose | chlorococcoid and other green | soredia | absent  | pycnidia    | absent                                 | absent               | absent          | usnic acid derivatives + terpenoids                                                  |
| <i>Cladonia digitata</i> (L.) Hoffm.                                         | fruticose | chlorococcoid and other green | soredia | Lecidea | pycnidia    | ascomata without carbonized structures | spores not pigmented | spores 1-celled | $\beta$ -orcinol depsides + naphthaquinones                                          |
| <i>Cladonia fimbriata</i> (L.) Fr.                                           | fruticose | chlorococcoid and other green | soredia | Lecidea | pycnidia    | ascomata without carbonized structures | spores not pigmented | spores 1-celled | $\beta$ -orcinol depsidones + $\beta$ -orcinol depsides                              |
| <i>Cladonia floerkeana</i> (Fr.) Flörke                                      | fruticose | chlorococcoid and other green | absent  | Lecidea | pycnidia    | ascomata without carbonized structures | spores not pigmented | spores 1-celled | $\beta$ -orcinol depsides + naphthaquinones                                          |
| <i>Cladonia furcata</i> (Huds.) Schrad. subsp. <i>furcata</i>                | fruticose | chlorococcoid and other green | absent  | absent  | absent      | absent                                 | absent               | absent          | $\beta$ -orcinol depsidones + $\beta$ -orcinol depsides                              |
| <i>Cladonia glauca</i> Flörke                                                | fruticose | chlorococcoid and other green | soredia | absent  | absent      | absent                                 | absent               | absent          | $\beta$ -orcinol depsides                                                            |
| <i>Cladonia gracilis</i> (L.) Willd.                                         | fruticose | chlorococcoid and other green | absent  | absent  | absent      | absent                                 | absent               | absent          | $\beta$ -orcinol depsidones                                                          |
| <i>Cladonia grayi</i> Merrill ex Sandst.                                     | fruticose | chlorococcoid and other green | soredia | absent  | pycnidia    | absent                                 | absent               | absent          | orcinol depsidones + $\beta$ -orcinol depsidones                                     |
| <i>Cladonia incrassata</i> Flörke                                            | fruticose | chlorococcoid and other green | soredia | Lecidea | absent      | ascomata without carbonized structures | spores not pigmented | spores 1-celled | $\beta$ -orcinol depsides + dibenzofurans + usnic acid derivatives + naphthaquinones |
| <i>Cladonia macilenta</i> Hoffm.                                             | fruticose | chlorococcoid and other green | soredia | Lecidea | pycnidia    | ascomata without carbonized structures | spores not pigmented | spores 1-celled | $\beta$ -orcinol depsides + dibenzofurans + naphthaquinones                          |

|                                                                        |           |                               |         |          |          |                                                            |                      |                     |        |                                                                        |
|------------------------------------------------------------------------|-----------|-------------------------------|---------|----------|----------|------------------------------------------------------------|----------------------|---------------------|--------|------------------------------------------------------------------------|
| <i>Cladonia merochlorophaea</i> Asahina                                | fruticose | chlorococcoid and other green | soredia | absent   | pycnidia | absent                                                     | absent               | absent              | absent | orcinol depsides + $\beta$ -orcinol depsidones                         |
| <i>Cladonia norvegica</i> Tønsberg & Holien                            | fruticose | chlorococcoid and other green | soredia | absent   | absent   | absent                                                     | absent               | absent              | absent | $\beta$ -orcinol depsides + naphthaquinones                            |
| <i>Cladonia novochlorophaea</i> (Sipman) Brodo & Ahti                  | fruticose | chlorococcoid and other green | soredia | absent   | pycnidia | absent                                                     | absent               | absent              | absent | orcinol depsides + $\beta$ -orcinol depsidones                         |
| <i>Cladonia parasitica</i> (Hoffm.) Hoffm.                             | fruticose | chlorococcoid and other green | soredia | Lecidea  | pycnidia | ascomata without carbonized structures                     | spores not pigmented | spores 1-celled     |        | $\beta$ -orcinol depsides                                              |
| <i>Cladonia phyllophora</i> Hoffm.                                     | fruticose | chlorococcoid and other green | absent  | absent   | pycnidia | absent                                                     | absent               | absent              |        | $\beta$ -orcinol depsidones                                            |
| <i>Cladonia rangiferina</i> (L.) F. H. Wigg.                           | fruticose | chlorococcoid and other green | absent  | absent   | pycnidia | absent                                                     | absent               | absent              |        | $\beta$ -orcinol depsidones + $\beta$ -orcinol depsides                |
| <i>Cladonia squamosa</i> Hoffm.                                        | fruticose | chlorococcoid and other green | absent  | absent   | pycnidia | absent                                                     | absent               | absent              |        | $\beta$ -orcinol depsides                                              |
| <i>Cladonia subulata</i> (L.) F. H. Wigg.                              | fruticose | chlorococcoid and other green | soredia | absent   | absent   | absent                                                     | absent               | absent              |        | $\beta$ -orcinol depsidones                                            |
| <i>Cliostomum corrugatum</i> (Ach.) Fr.                                | crustose  | chlorococcoid and other green | absent  | Lecidea  | pycnidia | ascomata without carbonized structures                     | spores not pigmented | spores 2-celled     |        | aliphatic acids + $\beta$ -orcinol depsides + usnic acid derivatives   |
| <i>Cliostomum griffithii</i> (Sm.) Coppins                             | crustose  | chlorococcoid and other green | absent  | Lecidea  | pycnidia | ascomata with carbonized structures + ascomata with pruina | spores not pigmented | spores 2-celled     |        | aliphatic acids + $\beta$ -orcinol depsides                            |
| <i>Coenogonium pineti</i> (Schr. ex Ach.) Lücking & Lumbsch            | crustose  | trentepohlia                  | absent  | Lecidea  | pycnidia | ascomata without carbonized structures                     | spores not pigmented | spores 2-celled     |        | no substances                                                          |
| <i>Coniocarpon cinnabarinum</i> DC.                                    | crustose  | trentepohlia                  | absent  | arthonia | pycnidia | ascomata with carbonized structures + ascomata with pruina | spores not pigmented | spores multi-celled |        | antraquinoses                                                          |
| <i>Evernia divaricata</i> (L.) Ach.                                    | fruticose | chlorococcoid and other green | soredia | absent   | absent   | absent                                                     | absent               | absent              |        | orcinol depsides + usnic acid derivatives                              |
| <i>Evernia prunastri</i> (L.) Ach.                                     | fruticose | chlorococcoid and other green | soredia | absent   | absent   | absent                                                     | absent               | absent              |        | orcinol depsides + $\beta$ -orcinol depsides + usnic acid derivatives  |
| <i>Felipes leucopellaeus</i> (Ach.) Frisch & G.Thor                    | crustose  | trentepohlia                  | absent  | arthonia | absent   | ascomata with carbonized structures + ascomata with pruina | spores not pigmented | spores multi-celled |        | other substances                                                       |
| <i>Fellhanera bouteillei</i> (Desm.) Vězda                             | crustose  | chlorococcoid and other green | soredia | Lecidea  | pycnidia | ascomata without carbonized structures                     | spores not pigmented | spores 2-celled     |        | usnic acid derivatives + terpenoids                                    |
| <i>Fellhanera gyrophorica</i> Sérus., Coppins, Diederich & Scheidegger | crustose  | chlorococcoid and other green | absent  | Lecidea  | pycnidia | ascomata without carbonized structures                     | spores not pigmented | spores multi-celled |        | orcinol tridepsides                                                    |
| <i>Fellhanera subtilis</i> (Vězda) Diederich & Sérus.                  | crustose  | chlorococcoid and other green | absent  | Lecidea  | pycnidia | ascomata without carbonized structures                     | spores not pigmented | spores multi-celled |        | no substances                                                          |
| <i>Fellhaneropsis vezdae</i> (Coppins & P. James) Sérus. & Coppins     | crustose  | chlorococcoid and other green | isidia  | absent   | pycnidia | absent                                                     | absent               | absent              |        | no substances                                                          |
| <i>Flavoparmelia caperata</i> (L.) Hale                                | foliose   | chlorococcoid and other green | soredia | absent   | absent   | absent                                                     | absent               | absent              |        | aliphatic acids + $\beta$ -orcinol depsidones + usnic acid derivatives |
| <i>Fuscidea arboricola</i> Coppins & Tønsberg                          | crustose  | chlorococcoid and other green | soredia | Lecidea  | absent   | ascomata with carbonized structures                        | spores not pigmented | spores 1-celled     |        | $\beta$ -orcinol depsidones                                            |
| <i>Fuscidea pusilla</i> Tønsberg                                       | crustose  | chlorococcoid and other green | soredia | absent   | absent   | absent                                                     | absent               | absent              |        | orcinol depsides                                                       |
| <i>Graphis betulina</i> (Pers.) Gray.                                  | crustose  | trentepohlia                  | absent  | lirella  | absent   | ascomata with carbonized structures                        | spores not pigmented | spores multi-celled |        | no substances                                                          |

|                                                                           |          |                               |         |          |             |                                                            |                      |                     |                                                                              |
|---------------------------------------------------------------------------|----------|-------------------------------|---------|----------|-------------|------------------------------------------------------------|----------------------|---------------------|------------------------------------------------------------------------------|
| <i>Graphis pulverulenta</i> (Pers.) Ach.                                  | crustose | trentepohlia                  | absent  | lirella  | absent      | ascomata with carbonized structures + ascomata with pruina | spores not pigmented | spores multi-celled | no substances                                                                |
| <i>Graphis scripta</i> (L.) Ach.                                          | crustose | trentepohlia                  | absent  | lirella  | absent      | ascomata with carbonized structures + ascomata with pruina | spores not pigmented | spores multi-celled | no substances                                                                |
| <i>Gyalecta fagicola</i> (Arnold) Kremp.                                  | crustose | trentepohlia                  | absent  | Lecidea  | pycnidia    | ascomata with carbonized structures                        | spores not pigmented | spores multi-celled | no substances                                                                |
| <i>Gyalecta flotowii</i> Körb.                                            | crustose | trentepohlia                  | absent  | Lecidea  | absent      | ascomata without carbonized structures                     | spores not pigmented | spores muriform     | no substances                                                                |
| <i>Gyalecta truncigena</i> (Ach.) Hepp                                    | crustose | trentepohlia                  | absent  | Lecidea  | absent      | ascomata without carbonized structures                     | spores not pigmented | spores muriform     | no substances                                                                |
| <i>Gyalecta ulmi</i> (Sw.) Zahlbr.                                        | crustose | trentepohlia                  | absent  | Lecidea  | absent      | ascomata without carbonized structures                     | spores not pigmented | spores muriform     | no substances                                                                |
| <i>Halecania viridescens</i> Coppins & P.James                            | crustose | chlorococcoid and other green | soredia | absent   | absent      | absent                                                     | absent               | absent              | $\beta$ -orcinol depsidones                                                  |
| <i>Hertelidea botryosa</i> (Fr.) Printzen & Kantvilas                     | crustose | chlorococcoid and other green | soredia | Lecidea  | absent      | ascomata with carbonized structures                        | spores not pigmented | spores 1-celled     | orcinol depsides                                                             |
| <i>Hypocenomyce scalaris</i> (Ach.) M. Choisy                             | crustose | chlorococcoid and other green | soredia | absent   | pycnidia    | absent                                                     | absent               | absent              | orcinol depsides                                                             |
| <i>Hypogymnia farinacea</i> Zopf                                          | foliose  | chlorococcoid and other green | soredia | absent   | absent      | absent                                                     | absent               | absent              | orcinol depsidones + $\beta$ -orcinol depsides                               |
| <i>Hypogymnia physodes</i> (L.) Nyl.                                      | foliose  | chlorococcoid and other green | soredia | absent   | pycnidia    | absent                                                     | absent               | absent              | orcinol depsidones + $\beta$ -orcinol depsidones + $\beta$ -orcinol depsides |
| <i>Hypogymnia tubulosa</i> (Schaer.) Hav.                                 | foliose  | chlorococcoid and other green | soredia | absent   | absent      | absent                                                     | absent               | absent              | orcinol depsidones + $\beta$ -orcinol depsides                               |
| <i>Hypotrachyna revoluta</i> (Flörke) Hale                                | foliose  | chlorococcoid and other green | soredia | absent   | absent      | absent                                                     | absent               | absent              | orcinol depsides + $\beta$ -orcinol depsides + orcinol tridepsides           |
| <i>Icmadophila ericetorum</i> (L.) Zahlbr.                                | crustose | chlorococcoid and other green | absent  | Lecidea  | pycnidia    | ascomata without carbonized structures                     | spores not pigmented | spores multi-celled | orcinol depsides + $\beta$ -orcinol depsides                                 |
| <i>Imshaugia aleurites</i> (Ach.) S. L. F. Meyer                          | foliose  | chlorococcoid and other green | isidia  | absent   | pycnidia    | absent                                                     | spores not pigmented | absent              | $\beta$ -orcinol depsides                                                    |
| <i>Inoderma byssaceum</i> (Weigel) Gray                                   | crustose | trentepohlia                  | absent  | arthonia | pycnidia    | ascomata with carbonized structures + ascomata with pruina | spores not pigmented | spores multi-celled | orcinol depsides                                                             |
| <i>Inoderma sorediatum</i> Ertz, Łubek & Kukwa                            | crustose | trentepohlia                  | soredia | absent   | pycnidia    | absent                                                     | spores not pigmented | absent              | orcinol depsides                                                             |
| <i>Jamesiella anastomosans</i> (P. James & Vězda) Lücking, Sérus. & Vězda | crustose | chlorococcoid and other green | absent  | Lecidea  | hyphophores | ascomata without carbonized structures                     | spores not pigmented | spores muriform     | no substances                                                                |
| <i>Lecanactis abietina</i> (Ach.) Körb.                                   | crustose | trentepohlia                  | absent  | absent   | pycnidia    | absent                                                     | spores not pigmented | absent              | orcinol depsides + dibenzofurans                                             |
| <i>Lecania cyrtella</i> (Ach.) Th. Fr.                                    | crustose | chlorococcoid and other green | absent  | Lecidea  | pycnidia    | ascomata without carbonized structures                     | spores not pigmented | spores 2-celled     | no substances                                                                |
| <i>Lecania naegelii</i> (Hepp) Diederich & van den Boom                   | crustose | chlorococcoid and other green | absent  | Lecidea  | absent      | ascomata without carbonized structures                     | spores not pigmented | spores multi-celled | no substances                                                                |
| <i>Lecanographa amylacea</i> (Ehrh. ex Pers.) Egea & Torrente             | crustose | chlorococcoid and other green | soredia | absent   | absent      | absent                                                     | absent               | absent              | no substances                                                                |
| <i>Lecanora albella</i> (Pers.) Ach.                                      | crustose | chlorococcoid and other green | absent  | Lecanora | absent      | ascomata with carbonized structures + ascomata with        | spores not pigmented | spores 1-celled     | $\beta$ -orcinol depsidones + $\beta$ -orcinol depsides                      |

|                                                                    |          |                               |         |          |          |                                                            |                      |                 |                                                                           |
|--------------------------------------------------------------------|----------|-------------------------------|---------|----------|----------|------------------------------------------------------------|----------------------|-----------------|---------------------------------------------------------------------------|
| <i>Lecanora allophana</i> (Ach.) Nyl.                              | crustose | chlorococcoid and other green | absent  | Lecanora | absent   | pruina<br>ascomata without carbonized structures           | spores not pigmented | spores 1-celled | $\beta$ -orcinol depsides                                                 |
| <i>Lecanora argentata</i> (Ach.) Malme                             | crustose | chlorococcoid and other green | absent  | Lecanora | absent   | ascomata without carbonized structures                     | spores not pigmented | spores 1-celled | orcinol depsidones + $\beta$ -orcinol depsides                            |
| <i>Lecanora carpinea</i> (L.) Vain. s.l.                           | crustose | chlorococcoid and other green | absent  | Lecanora | pycnidia | ascomata with carbonized structures + ascomata with pruina | spores not pigmented | spores 1-celled | other substances + $\beta$ -orcinol depsides                              |
| <i>Lecanora chlarotera</i> Nyl.                                    | crustose | chlorococcoid and other green | absent  | Lecanora | pycnidia | ascomata without carbonized structures                     | spores not pigmented | spores 1-celled | aliphatic acids + orcinol depsidones + $\beta$ -orcinol depsides          |
| <i>Lecanora compallens</i> Herk & Aptroot                          | crustose | chlorococcoid and other green | soredia | absent   | absent   | absent                                                     | absent               | absent          | usnic acid derivatives + terpenoids                                       |
| <i>Lecanora conizaeoides</i> Cromb.                                | crustose | chlorococcoid and other green | soredia | Lecanora | absent   | ascomata without carbonized structures                     | spores not pigmented | spores 1-celled | $\beta$ -orcinol depsidones + usnic acid derivatives                      |
| <i>Lecanora expallens</i> Ach.                                     | crustose | chlorococcoid and other green | soredia | absent   | absent   | absent                                                     | absent               | absent          | usnic acid derivatives + xanthones                                        |
| <i>Lecanora farinaria</i> Borrer                                   | crustose | chlorococcoid and other green | soredia | Lecanora | absent   | ascomata without carbonized structures                     | spores not pigmented | spores 1-celled | aliphatic acids + $\beta$ -orcinol depsides                               |
| <i>Lecanora filamentosa</i> (Stirt.) Elix & Palice                 | crustose | chlorococcoid and other green | absent  | Lecanora | absent   | ascomata without carbonized structures                     | spores not pigmented | spores 1-celled | $\beta$ -orcinol depsides + usnic acid derivatives                        |
| <i>Lecanora glabrata</i> (Ach.) Malme                              | crustose | chlorococcoid and other green | absent  | Lecanora | absent   | ascomata without carbonized structures                     | spores not pigmented | spores 1-celled | $\beta$ -orcinol depsides                                                 |
| <i>Lecanora pulicaris</i> (Pers.) Ach.                             | crustose | chlorococcoid and other green | absent  | Lecanora | absent   | ascomata without carbonized structures                     | spores not pigmented | spores 1-celled | aliphatic acids + $\beta$ -orcinol depsidones + $\beta$ -orcinol depsides |
| <i>Lecanora quercicola</i> Coppins & P. James                      | crustose | chlorococcoid and other green | absent  | Lecanora | pycnidia | ascomata with carbonized structures + ascomata with pruina | spores not pigmented | spores 1-celled | usnic acid derivatives                                                    |
| <i>Lecanora saligna</i> (Schräd.) Zahlbr. s.l.                     | crustose | chlorococcoid and other green | absent  | Lecanora | pycnidia | ascomata without carbonized structures                     | spores not pigmented | spores 1-celled | $\beta$ -orcinol depsides + usnic acid derivatives + terpenoids           |
| <i>Lecanora sarcopidoides</i> (A. Massal.) A. L. Sm.               | crustose | chlorococcoid and other green | absent  | Lecanora | pycnidia | ascomata with carbonized structures + ascomata with pruina | spores not pigmented | spores 1-celled | usnic acid derivatives                                                    |
| <i>Lecanora stanislai</i> Guzow-Krzemińska, Łubek, Malíček & Kukwa | crustose | chlorococcoid and other green | soredia | absent   | absent   | absent                                                     | absent               | absent          | usnic acid derivatives + terpenoids                                       |
| <i>Lecanora symmicta</i> (Ach.) Ach.                               | crustose | chlorococcoid and other green | absent  | Lecanora | absent   | ascomata without carbonized structures                     | spores not pigmented | spores 1-celled | usnic acid derivatives + xanthones + terpenoids                           |
| <i>Lecanora thysanophora</i> R.C. Harris                           | crustose | chlorococcoid and other green | soredia | absent   | absent   | absent                                                     | absent               | absent          | $\beta$ -orcinol depsides + usnic acid derivatives + terpenoids           |
| <i>Lecanora varia</i> (Hoffm.) Ach                                 | crustose | chlorococcoid and other green | absent  | Lecanora | pycnidia | ascomata without carbonized structures                     | spores not pigmented | spores 1-celled | $\beta$ -orcinol depsidones + usnic acid derivatives                      |
| <i>Lecidea nylanderi</i> (Anzi) Th. Fr.                            | crustose | chlorococcoid and other green | soredia | Lecidea  | absent   | ascomata with carbonized structures                        | spores not pigmented | spores 1-celled | orcinol depsides                                                          |
| <i>Lecidea turgidula</i> Fr.                                       | crustose | chlorococcoid and other green | absent  | Lecidea  | pycnidia | ascomata with carbonized structures + ascomata with pruina | spores not pigmented | spores 1-celled | usnic acid derivatives                                                    |
| <i>Lecidella elaeochroma</i> (Ach.) M. Choisy                      | crustose | chlorococcoid and other green | absent  | Lecidea  | absent   | ascomata with carbonized structures                        | spores not pigmented | spores 1-celled | xanthones                                                                 |
| <i>Lecidella subviridis</i> Tønsberg                               | crustose | chlorococcoid                 | soredia | absent   | absent   | absent                                                     | absent               | absent          | $\beta$ -orcinol depsides + xanthones                                     |

|                                                                                                   |          |                                               |         |          |          |                                                            |                      |                     |                                                                           |
|---------------------------------------------------------------------------------------------------|----------|-----------------------------------------------|---------|----------|----------|------------------------------------------------------------|----------------------|---------------------|---------------------------------------------------------------------------|
| <i>Lepra albescens</i> (Huds.) Hafellner                                                          | crustose | and other green chlorococcoid                 | soredia | absent   | absent   | absent                                                     | absent               | absent              | aliphatic acids                                                           |
| <i>Lepra amara</i> (Ach.) Hafellner                                                               | crustose | and other green chlorococcoid and other green | soredia | absent   | absent   | absent                                                     | absent               | absent              | other substances + $\beta$ -orcinol depsidones                            |
| <i>Leprantha cinereopruinosa</i> (Schaer.) Krb.                                                  | crustose | trentepohlia                                  | absent  | arthonia | absent   | ascomata with carbonized structures + ascomata with pruina | spores not pigmented | spores 2-celled     | no substances                                                             |
| <i>Lepraria eburnea</i> J. R. Laundon                                                             | leprose  | chlorococcoid and other green                 | soredia | absent   | absent   | absent                                                     | absent               | absent              | benzyl esters + $\beta$ -orcinol depsidones                               |
| <i>Lepraria ecorticata</i> (J.R. Laundon) Kukwa                                                   | leprose  | chlorococcoid and other green                 | soredia | absent   | absent   | absent                                                     | absent               | absent              | $\beta$ -orcinol depsides + usnic acid derivatives + terpenoids           |
| <i>Lepraria elobata</i> Tnsberg                                                                  | leprose  | chlorococcoid and other green                 | soredia | absent   | absent   | absent                                                     | absent               | absent              | $\beta$ -orcinol depsidones + $\beta$ -orcinol depsides + terpenoids      |
| <i>Lepraria finkii</i> (B. de Lesd.) R.C. Harris                                                  | leprose  | chlorococcoid and other green                 | soredia | absent   | absent   | absent                                                     | absent               | absent              | $\beta$ -orcinol depsidones + $\beta$ -orcinol depsides + terpenoids      |
| <i>Lepraria incana</i> (L.) Ach.                                                                  | leprose  | chlorococcoid and other green                 | soredia | absent   | absent   | absent                                                     | absent               | absent              | orcinol depsides + terpenoids                                             |
| <i>Lepraria jackii</i> Tnsberg                                                                   | leprose  | chlorococcoid and other green                 | soredia | absent   | absent   | absent                                                     | absent               | absent              | aliphatic acids + $\beta$ -orcinol depsides                               |
| <i>Lepraria rigidula</i> (B. de Lesd.) Tnsberg                                                   | leprose  | chlorococcoid and other green                 | soredia | absent   | absent   | absent                                                     | absent               | absent              | aliphatic acids + $\beta$ -orcinol depsides                               |
| <i>Lepraria umbricola</i> Tnsberg                                                                | leprose  | chlorococcoid and other green                 | soredia | absent   | absent   | absent                                                     | absent               | absent              | $\beta$ -orcinol depsides                                                 |
| <i>Lepraria vouauxii</i> (Hue) R. C. Harris                                                       | leprose  | chlorococcoid and other green                 | soredia | absent   | absent   | absent                                                     | absent               | absent              | dibenzofurans                                                             |
| <i>Lobaria pulmonaria</i> (L.) Hoffm.                                                             | foliose  | chlorococcoid and other green                 | soredia | Lecanora | pycnidia | ascomata without carbonized structures                     | spores not pigmented | spores multi-celled | $\beta$ -orcinol depsidones                                               |
| <i>Loxospora cristinae</i> Guzew-Krzemińska, Lubek, Kubiak & Kukwa                                | crustose | chlorococcoid and other green                 | soredia | absent   | absent   | absent                                                     | absent               | absent              | orcinol depsides                                                          |
| <i>Loxospora elatina</i> (Ach.) A.Massal.                                                         | crustose | chlorococcoid and other green                 | soredia | absent   | absent   | absent                                                     | absent               | absent              | $\beta$ -orcinol depsides                                                 |
| <i>Melanelixia glabratula</i> (Lamy) Sandler & Arup                                               | foliose  | chlorococcoid and other green                 | isidia  | absent   | pycnidia | absent                                                     | absent               | absent              | orcinol depsides                                                          |
| <i>Melanelixia subaurifera</i> (Nyl.) O. Blanco, A. Crespo, Divakar, Essl., D. Hawksw. & Lumbsch  | foliose  | chlorococcoid and other green                 | soredia | absent   | pycnidia | absent                                                     | absent               | absent              | orcinol depsides                                                          |
| <i>Melanohalea exasperatula</i> (Nyl.) O. Blanco, A. Crespo, Divakar, Essl., D. Hawksw. & Lumbsch | foliose  | chlorococcoid and other green                 | isidia  | absent   | pycnidia | absent                                                     | absent               | absent              | no substances                                                             |
| <i>Menegazzia terebrata</i> (Hoffm.) A. Massal.                                                   | foliose  | chlorococcoid and other green                 | soredia | absent   | pycnidia | absent                                                     | absent               | absent              | aliphatic acids + $\beta$ -orcinol depsidones + $\beta$ -orcinol depsides |
| <i>Micarea botryoides</i> (Nyl.) Coppins                                                          | crustose | chlorococcoid and other green                 | absent  | Lecidea  | pycnidia | ascomata without carbonized structures                     | spores not pigmented | spores multi-celled | no substances                                                             |
| <i>Micarea byssacea</i> (Th. Fr.) Czarnota et. al.                                                | crustose | chlorococcoid and other green                 | absent  | Lecidea  | absent   | ascomata without carbonized structures                     | spores not pigmented | spores 2-celled     | diphenyl ethers                                                           |
| <i>Micarea denigrata</i> (Fr.) Hedl.                                                              | crustose | chlorococcoid and other green                 | absent  | Lecidea  | pycnidia | ascomata without carbonized structures                     | spores not pigmented | spores 2-celled     | orcinol tridepsides                                                       |
| <i>Micarea elachista</i> (Krb.) Coppins &                                                        | crustose | chlorococcoid                                 | absent  | Lecidea  | pycnidia | ascomata without carbonized                                | spores not           | spores 1-celled     | no substances                                                             |

|                                                                                     |          |          |                                               |         |          |          |                                                              |                                |                     |                                                                       |
|-------------------------------------------------------------------------------------|----------|----------|-----------------------------------------------|---------|----------|----------|--------------------------------------------------------------|--------------------------------|---------------------|-----------------------------------------------------------------------|
| <i>Micarea flavoleprosa</i> Launis, Malíček & Sérus.                                | R. Sant. | crustose | and other green chlorococcoid and other green | soredia | Lecidea  | pycnidia | structures without carbonized structures                     | pigmented spores not pigmented | spores 2-celled     | diphenyl ethers                                                       |
| <i>Micarea hedlundii</i> Coppins                                                    |          | crustose | chlorococcoid and other green                 | absent  | Lecidea  | pycnidia | structures without carbonized structures                     | spores not pigmented           | spores 1-celled     | no substances                                                         |
| <i>Micarea isidiopraisina</i> Brand, van den Boom, Guzow-Krzemińska, Sérus. & Kukwa |          | crustose | chlorococcoid and other green                 | isidia  | Lecidea  | absent   | structures without carbonized structures                     | spores not pigmented           | spores 1-celled     | diphenyl ethers                                                       |
| <i>Micarea melaena</i> (Nyl.) Hedl.                                                 |          | crustose | chlorococcoid and other green                 | absent  | Lecidea  | pycnidia | structures with carbonized structures                        | spores not pigmented           | spores multi-celled | orcinol tridepsides                                                   |
| <i>Micarea micrococca</i> (Körb.) Gams ex Coppins                                   |          | crustose | chlorococcoid and other green                 | absent  | Lecidea  | pycnidia | structures without carbonized structures                     | spores not pigmented           | spores 1-celled     | diphenyl ethers                                                       |
| <i>Micarea microsorediata</i> Brand, van den Boom, Guzow-Krzemińska, Sérus. & Kukwa |          | crustose | chlorococcoid and other green                 | soredia | Lecidea  | pycnidia | structures without carbonized structures                     | spores not pigmented           | spores 2-celled     | diphenyl ethers                                                       |
| <i>Micarea misella</i> (Nyl.) Hedl.                                                 |          | crustose | chlorococcoid and other green                 | absent  | Lecidea  | pycnidia | structures without carbonized structures                     | spores not pigmented           | spores 1-celled     | no substances                                                         |
| <i>Micarea nigella</i> Coppins                                                      |          | crustose | chlorococcoid and other green                 | absent  | Lecidea  | pycnidia | structures without carbonized structures                     | spores not pigmented           | spores 1-celled     | no substances                                                         |
| <i>Micarea nitschkeana</i> (J. Lahm ex Rabenh.) Harm.                               |          | crustose | chlorococcoid and other green                 | absent  | Lecidea  | pycnidia | structures without carbonized structures                     | spores not pigmented           | spores multi-celled | no substances                                                         |
| <i>Micarea pauli</i> Guzow-Krzemińska, Łubek & Kukwa                                |          | crustose | chlorococcoid and other green                 | isidia  | Lecidea  | absent   | structures without carbonized structures                     | spores not pigmented           | spores 1-celled     | diphenyl ethers                                                       |
| <i>Micarea prasina</i> Fr.                                                          |          | crustose | chlorococcoid and other green                 | absent  | Lecidea  | pycnidia | structures without carbonized structures                     | spores not pigmented           | spores 2-celled     | diphenyl ethers                                                       |
| <i>Micarea soralifera</i> Guzow-Krzemińska et al.                                   |          | crustose | chlorococcoid and other green                 | soredia | Lecidea  | absent   | structures without carbonized structures                     | spores not pigmented           | spores 2-celled     | diphenyl ethers                                                       |
| <i>Micarea tomentosa</i> Czarnota & Coppins                                         |          | crustose | chlorococcoid and other green                 | absent  | Lecidea  | pycnidia | structures without carbonized structures                     | spores not pigmented           | spores 2-celled     | no substances                                                         |
| <i>Micarea viridileprosa</i> Coppins & van den Boom                                 |          | crustose | chlorococcoid and other green                 | soredia | absent   | absent   | absent                                                       | absent                         | absent              | orcinol tridepsides                                                   |
| <i>Microcalicium ahlneri</i> Tibell                                                 |          | crustose | algae absent                                  | absent  | stalked  | absent   | structures with carbonized structures                        | spores pigmented               | spores multi-celled | no substances                                                         |
| <i>Microcalicium disseminatum</i> (Ach.) Vainio                                     |          | crustose | algae absent                                  | absent  | stalked  | pycnidia | structures with carbonized structures                        | spores pigmented               | spores multi-celled | no substances                                                         |
| <i>Mycoblastus alpinus</i> (Fr.) Hellb.                                             |          | crustose | chlorococcoid and other green                 | soredia | absent   | absent   | absent                                                       | absent                         | absent              | orcinol depsides + $\beta$ -orcinol depsides + usnic acid derivatives |
| <i>Mycocalicium subtile</i> (Pers.) Szatala                                         |          | crustose | algae absent                                  | absent  | stalked  | absent   | structures with carbonized structures                        | spores pigmented               | spores 1-celled     | no substances                                                         |
| <i>Myriolecis hagenii</i> (Ach.) Śliwa, Zhao Xin & Lumbsch                          |          | crustose | chlorococcoid and other green                 | absent  | Lecanora | absent   | structures with carbonized structures + ascomata with pruina | spores not pigmented           | spores 1-celled     | no substances                                                         |
| <i>Myriolecis persimilis</i> (Th. Fr.) Śliwa, Zhao Xin & Lumbsch                    |          | crustose | chlorococcoid and other green                 | absent  | Lecanora | absent   | structures without carbonized structures                     | spores not pigmented           | spores 1-celled     | no substances                                                         |
| <i>Normandina pulchella</i> (Borrer) Nyl.                                           |          | foliose  | chlorococcoid and other green                 | soredia | absent   | absent   | absent                                                       | absent                         | absent              | terpenoids                                                            |
| <i>Ochrolechia alboflavescens</i> (Wulfen) Zahlbr.                                  |          | crustose | chlorococcoid and other green                 | soredia | absent   | absent   | absent                                                       | absent                         | absent              | aliphatic acids + orcinol depsidones                                  |

|                                                            |          |                               |         |          |          |                                        |                      |                     |        |                                                                                                |
|------------------------------------------------------------|----------|-------------------------------|---------|----------|----------|----------------------------------------|----------------------|---------------------|--------|------------------------------------------------------------------------------------------------|
| <i>Ochrolechia androgyna</i> (Hoffm.) Arnold               | crustose | chlorococcoid and other green | soredia | absent   | absent   | absent                                 | absent               | absent              | absent | orcinol depsides + orcinol tridepsides                                                         |
| <i>Ochrolechia arborea</i> (Kreyer) Almb.                  | crustose | chlorococcoid and other green | soredia | absent   | absent   | absent                                 | absent               | absent              | absent | orcinol depsides + orcinol tridepsides + xanthones                                             |
| <i>Ochrolechia bahusiensis</i> H. Magn.                    | crustose | chlorococcoid and other green | soredia | absent   | absent   | absent                                 | absent               | absent              | absent | aliphatic acids + orcinol depsides + orcinol tridepsides                                       |
| <i>Ochrolechia microstictoides</i> Räsänen                 | crustose | chlorococcoid and other green | soredia | absent   | absent   | absent                                 | absent               | absent              | absent | aliphatic acids + orcinol depsidones                                                           |
| <i>Ochrolechia pallescens</i> (L.) A. Massal.              | crustose | chlorococcoid and other green | absent  | Lecanora | absent   | ascomata without carbonized structures | spores not pigmented | spores 1-celled     | absent | aliphatic acids + orcinol depsidones + orcinol tridepsides                                     |
| <i>Ochrolechia turneri</i> (Sm.) Hasselrot                 | crustose | chlorococcoid and other green | soredia | absent   | absent   | absent                                 | absent               | absent              | absent | orcinol depsidones + orcinol depsides                                                          |
| <i>Opegrapha niveoatra</i> (Borrer) J. R. Laundon          | crustose | trentepohlia                  | absent  | lirella  | pycnidia | ascomata with carbonized structures    | spores not pigmented | spores multi-celled | absent | no substances                                                                                  |
| <i>Opegrapha rufescens</i> Pers.                           | crustose | trentepohlia                  | absent  | lirella  | pycnidia | ascomata with carbonized structures    | spores not pigmented | spores multi-celled | absent | no substances                                                                                  |
| <i>Opegrapha vermicellifera</i> (Kunze) J. R. Laundon      | crustose | trentepohlia                  | absent  | lirella  | pycnidia | ascomata with carbonized structures    | spores not pigmented | spores multi-celled | absent | no substances                                                                                  |
| <i>Opegrapha vulgata</i> Ach.                              | crustose | trentepohlia                  | absent  | lirella  | pycnidia | ascomata with carbonized structures    | spores not pigmented | spores multi-celled | absent | no substances                                                                                  |
| <i>Parmelia barrenoae</i> Divakar, M.C. Molina & A.Crespo  | foliose  | chlorococcoid and other green | soredia | absent   | absent   | absent                                 | absent               | absent              | absent | $\beta$ -orcinol depsidones + $\beta$ -orcinol depsides                                        |
| <i>Parmelia ernstiae</i> Feuerer & A. Thell                | foliose  | chlorococcoid and other green | isidia  | absent   | pycnidia | absent                                 | absent               | absent              | absent | aliphatic acids + orcinol depsidones + $\beta$ -orcinol depsidones + $\beta$ -orcinol depsides |
| <i>Parmelia saxatilis</i> (L.) Ach.                        | foliose  | chlorococcoid and other green | isidia  | absent   | pycnidia | absent                                 | absent               | absent              | absent | orcinol depsidones + $\beta$ -orcinol depsidones + $\beta$ -orcinol depsides                   |
| <i>Parmelia serrana</i> A. Crespo, M.C. Molina & D. Hawksw | foliose  | chlorococcoid and other green | isidia  | absent   | pycnidia | absent                                 | absent               | absent              | absent | aliphatic acids + orcinol depsidones + $\beta$ -orcinol depsidones + $\beta$ -orcinol depsides |
| <i>Parmelia sulcata</i> Taylor                             | foliose  | chlorococcoid and other green | soredia | absent   | pycnidia | absent                                 | absent               | absent              | absent | $\beta$ -orcinol depsidones + $\beta$ -orcinol depsides                                        |
| <i>Parmeliopsis ambigua</i> (Wulfen) Nyl.                  | foliose  | chlorococcoid and other green | soredia | absent   | absent   | absent                                 | absent               | absent              | absent | orcinol depsides + $\beta$ -orcinol depsides + usnic acid derivatives                          |
| <i>Parmeliopsis hyperopta</i> (Ach.) Arnold                | foliose  | chlorococcoid and other green | soredia | absent   | absent   | absent                                 | absent               | absent              | absent | orcinol depsides + $\beta$ -orcinol depsides                                                   |
| <i>Peltigera canina</i> (L.) Willd.                        | foliose  | cyanobacteria                 | absent  | absent   | absent   | absent                                 | absent               | absent              | absent | no substances                                                                                  |
| <i>Peltigera polydactylon</i> (Neck.) Hoffm.               | foliose  | cyanobacteria                 | absent  | absent   | absent   | absent                                 | absent               | absent              | absent | orcinol tridepsides                                                                            |
| <i>Peltigera praetextata</i> (Sammerf.) Zopf               | foliose  | cyanobacteria                 | isidia  | Lecidea  | absent   | ascomata without carbonized structures | spores not pigmented | spores multi-celled | absent | no substances                                                                                  |
| <i>Pertusaria alpina</i> Hepp ex Ahles                     | crustose | chlorococcoid and other green | absent  | Lecanora | absent   | ascomata without carbonized structures | spores not pigmented | spores 1-celled     | absent | $\beta$ -orcinol depsidones                                                                    |
| <i>Pertusaria coccodes</i> (Ach.) Nyl.                     | crustose | chlorococcoid and other green | isidia  | absent   | absent   | absent                                 | absent               | absent              | absent | $\beta$ -orcinol depsidones                                                                    |
| <i>Pertusaria coronata</i> (Ach.) Th.Fr.                   | crustose | chlorococcoid and other green | isidia  | absent   | absent   | absent                                 | absent               | absent              | absent | $\beta$ -orcinol depsidones                                                                    |
| <i>Pertusaria flavida</i> (DC.) J.R. Laundon               | crustose | chlorococcoid and other green | isidia  | absent   | absent   | absent                                 | absent               | absent              | absent | xanthones                                                                                      |
| <i>Pertusaria leioplaca</i> DC.                            | crustose | chlorococcoid                 | absent  | Lecanora | absent   | ascomata without carbonized            | spores not           | spores 1-celled     | absent | $\beta$ -orcinol depsidones                                                                    |

|                                                                    |           |                               |         |            |          |                                                            |                      |                     |                                        |  |
|--------------------------------------------------------------------|-----------|-------------------------------|---------|------------|----------|------------------------------------------------------------|----------------------|---------------------|----------------------------------------|--|
|                                                                    |           | and other green               |         |            |          | structures                                                 | pigmented            |                     |                                        |  |
| <i>Pertusaria ophthalmiza</i> (Nyl.) Nyl.                          | crustose  | chlorococcoid and other green | soredia | Lecanora   | absent   | ascomata with carbonized structures + ascomata with pruina | spores not pigmented | spores 1-celled     | aliphatic acids                        |  |
| <i>Pertusaria pertusa</i> (Weigel) Tuck.                           | crustose  | chlorococcoid and other green | absent  | Lecanora   | pycnidia | ascomata without carbonized structures                     | spores not pigmented | spores 1-celled     | β-orcinol depsidones                   |  |
| <i>Pertusaria pupillaris</i> (Nyl.) Th. Fr.                        | crustose  | chlorococcoid and other green | soredia | absent     | absent   | absent                                                     | absent               | absent              | β-orcinol depsidones                   |  |
| <i>Phaeophyscia nigricans</i> (Flörke) Moberg                      | foliose   | chlorococcoid and other green | isidia  | absent     | absent   | absent                                                     | absent               | absent              | no substances                          |  |
| <i>Phaeophyscia orbicularis</i> (Neck.) Moberg                     | foliose   | chlorococcoid and other green | soredia | absent     | pycnidia | absent                                                     | absent               | absent              | no substances                          |  |
| <i>Phlyctis agelaea</i> (Ach.) Flot.                               | crustose  | chlorococcoid and other green | soredia | Lecanora   | absent   | ascomata without carbonized structures                     | spores not pigmented | spores muriform     | β-orcinol depsidones                   |  |
| <i>Phlyctis argena</i> (Spreng.) Flot.                             | crustose  | chlorococcoid and other green | soredia | absent     | absent   | absent                                                     | absent               | absent              | β-orcinol depsidones                   |  |
| <i>Physcia adscendens</i> H. Olivier                               | foliose   | chlorococcoid and other green | soredia | Lecanora   | pycnidia | ascomata with carbonized structures + ascomata with pruina | spores pigmented     | spores 2-celled     | β-orcinol depsides                     |  |
| <i>Physcia aipolia</i> (Humb.) Fűrnr.                              | foliose   | chlorococcoid and other green | absent  | Lecanora   | pycnidia | ascomata with carbonized structures + ascomata with pruina | spores pigmented     | spores 2-celled     | β-orcinol depsides + terpenoids        |  |
| <i>Physcia stellaris</i> (L.) Nyl.                                 | foliose   | chlorococcoid and other green | absent  | Lecanora   | pycnidia | ascomata with carbonized structures + ascomata with pruina | spores pigmented     | spores 2-celled     | β-orcinol depsides                     |  |
| <i>Physcia tenella</i> (Scop.) DC.                                 | foliose   | chlorococcoid and other green | soredia | Lecanora   | pycnidia | ascomata with carbonized structures + ascomata with pruina | spores pigmented     | spores 2-celled     | β-orcinol depsides                     |  |
| <i>Physconia distorta</i> (With.) J. R. Laundon                    | foliose   | chlorococcoid and other green | absent  | Lecanora   | pycnidia | ascomata with carbonized structures + ascomata with pruina | spores pigmented     | spores 2-celled     | no substances                          |  |
| <i>Piccola ochrophora</i> (Nyl.) Hafellner                         | crustose  | chlorococcoid and other green | absent  | Lecidea    | pycnidia | ascomata with carbonized structures + ascomata with pruina | spores not pigmented | spores 1-celled     | antraquinoses                          |  |
| <i>Placynthiella dasaea</i> (Stirt.) Tønsberg                      | crustose  | chlorococcoid and other green | soredia | Lecidea    | absent   | ascomata without carbonized structures                     | spores not pigmented | spores 1-celled     | orcinol depsides + orcinol tridepsides |  |
| <i>Placynthiella icmalea</i> (Ach.) Coppins & P. James             | crustose  | chlorococcoid and other green | isidia  | Lecidea    | absent   | ascomata without carbonized structures                     | spores not pigmented | spores 1-celled     | orcinol depsides + orcinol tridepsides |  |
| <i>Placynthiella oligotropa</i> (J. R. Laundon) Coppins & P. James | crustose  | chlorococcoid and other green | absent  | Lecidea    | pycnidia | ascomata with carbonized structures                        | spores not pigmented | spores 1-celled     | no substances                          |  |
| <i>Platismatia glauca</i> (L.) W.L. Culb. & C. F. Culb.            | foliose   | chlorococcoid and other green | soredia | absent     | pycnidia | absent                                                     | absent               | absent              | aliphatic acids + β-orcinol depsides   |  |
| <i>Polycauliona polycarpa</i> (Hoffm.) Frödén, Arup, & Söchting    | foliose   | chlorococcoid and other green | absent  | Lecanora   | pycnidia | ascomata without carbonized structures                     | spores not pigmented | spores 1-celled     | antraquinoses                          |  |
| <i>Porina aenea</i> (Wallr.) Zahlbr.                               | crustose  | trentepohlia                  | absent  | perithecia | pycnidia | ascomata with carbonized structures                        | spores not pigmented | spores multi-celled | no substances                          |  |
| <i>Protoparmelia hypotremella</i> van Herk, Spier & V. Wirth       | crustose  | chlorococcoid and other green | absent  | absent     | absent   | absent                                                     | absent               | absent              | orcinol depsidones                     |  |
| <i>Pseudevernia furfuracea</i> (L.) Zopf                           | fruticose | chlorococcoid                 | isidia  | absent     | absent   | absent                                                     | absent               | absent              | orcinol depsides + β-orcinol           |  |

|                                                                  |           |                               |         |            |             |                                                            |                      |                     |           |                                     |
|------------------------------------------------------------------|-----------|-------------------------------|---------|------------|-------------|------------------------------------------------------------|----------------------|---------------------|-----------|-------------------------------------|
|                                                                  |           | and other green chlorococcoid |         |            |             |                                                            |                      |                     |           | depsides                            |
| <i>Psilolechia clavulifera</i> (Nyl.) Coppins                    | crustose  | and other green chlorococcoid | absent  | Lecidea    | absent      | ascomata without carbonized structures                     | spores not pigmented | spores 1-celled     |           | no substances                       |
| <i>Psilolechia lucida</i> (Ach.) M. Choisy                       | leprose   | and other green chlorococcoid | absent  | Lecidea    | absent      | ascomata without carbonized structures                     | spores not pigmented | spores 1-celled     |           | pulvinic acid derivatives           |
| <i>Psoroglaena abscondita</i> (Coppins & Vězda) Hafellner & Türk | crustose  | and other green chlorococcoid | absent  | perithecia | absent      | ascomata without carbonized structures                     | spores not pigmented | spores multi-celled |           | no substances                       |
| <i>Pycnora sorophora</i> (Vain.) Hafellner                       | crustose  | and other green chlorococcoid | soredia | absent     | pycnidia    | absent                                                     | absent               | absent              |           | benzyl esters                       |
| <i>Pyrenula chlorospila</i> (Nyl.) Arnold                        | crustose  | trentepohlia                  | absent  | perithecia | absent      | ascomata with carbonized structures                        | spores pigmented     | spores multi-celled |           | xanthones                           |
| <i>Pyrenula laevigata</i> (Pers.) Arnold                         | crustose  | trentepohlia                  | absent  | perithecia | pycnidia    | ascomata with carbonized structures                        | spores pigmented     | spores multi-celled |           | xanthones                           |
| <i>Pyrenula nitida</i> (Weigel) Ach.                             | crustose  | trentepohlia                  | absent  | perithecia | pycnidia    | ascomata with carbonized structures                        | spores pigmented     | spores multi-celled |           | antraquinoses                       |
| <i>Pyrenula nitidella</i> (Flörke ex Schaer.) Müll. Arg.         | crustose  | trentepohlia                  | absent  | perithecia | absent      | ascomata with carbonized structures                        | spores pigmented     | spores multi-celled |           | antraquinoses                       |
| <i>Ramalina farinacea</i> (L.) Ach.                              | fruticose | chlorococcoid and other green | soredia | Lecanora   | absent      | ascomata without carbonized structures                     | spores not pigmented | spores 2-celled     | β-orcinol | depsidones + usnic acid derivatives |
| <i>Ramalina pollinaria</i> (Westr.) Ach. s.l.                    | fruticose | chlorococcoid and other green | soredia | Lecanora   | absent      | ascomata without carbonized structures                     | spores not pigmented | spores 2-celled     | orcinol   | depsides + usnic acid derivatives   |
| <i>Ramalina thrausta</i> (Ach.) Nyl.                             | fruticose | chlorococcoid and other green | soredia | absent     | absent      | absent                                                     | absent               | absent              |           | usnic acid derivatives              |
| <i>Reichlingia leopoldii</i> Diederich & Scheid.                 | leprose   | trentepohlia                  | soredia | absent     | sporodochia | absent                                                     | absent               | absent              |           | orcinol depsides                    |
| <i>Rinodina efflorescens</i> Malme                               | crustose  | chlorococcoid and other green | soredia | Lecanora   | absent      | ascomata without carbonized structures                     | spores pigmented     | spores 2-celled     | β-orcinol | depsidones                          |
| <i>Rinodina pyrina</i> (Ach.) Arnold                             | crustose  | chlorococcoid and other green | absent  | Lecanora   | absent      | ascomata without carbonized structures                     | spores pigmented     | spores 2-celled     |           | no substances                       |
| <i>Rinodina subparieta</i> (Nyl.) Zahlbr.                        | crustose  | chlorococcoid and other green | soredia | absent     | absent      | absent                                                     | absent               | absent              | β-orcinol | depsides + terpenoids               |
| <i>Ropalospora viridis</i> (Tønsberg) Tønsberg                   | crustose  | chlorococcoid and other green | soredia | absent     | absent      | absent                                                     | absent               | absent              |           | orcinol depsides                    |
| <i>Schismatomma pericleum</i> (Ach.) Branth                      | crustose  | trentepohlia                  | absent  | Lecanora   | absent      | ascomata with carbonized structures                        | spores not pigmented | spores multi-celled |           | aliphatic acids                     |
| <i>Sclerophora coniophaea</i> (Norman) Mattsson & Middelb.       | crustose  | trentepohlia                  | absent  | stalked    | absent      | ascomata with carbonized structures + ascomata with pruina | spores not pigmented | spores 1-celled     |           | antraquinoses                       |
| <i>Sclerophora farinacea</i> (Chevall.) Chevall                  | crustose  | trentepohlia                  | absent  | stalked    | absent      | ascomata with carbonized structures + ascomata with pruina | spores not pigmented | spores 1-celled     |           | antraquinoses                       |
| <i>Sclerophora pallida</i> (Pers.) Y.J. Yao & Spooner            | crustose  | trentepohlia                  | absent  | stalked    | absent      | ascomata with carbonized structures + ascomata with pruina | spores not pigmented | spores 1-celled     |           | no substances                       |
| <i>Scoliciosporum chlorococcum</i> (Stenh.) Vězda                | crustose  | chlorococcoid and other green | absent  | Lecidea    | absent      | ascomata without carbonized structures                     | spores not pigmented | spores multi-celled |           | no substances                       |
| <i>Scoliciosporum gallurae</i> Vězda & Poelt                     | crustose  | chlorococcoid and other green | soredia | Lecidea    | absent      | ascomata without carbonized structures                     | spores not pigmented | spores multi-celled |           | orcinol tridepsides                 |
| <i>Scoliciosporum sarothamni</i> (Vain.)                         | crustose  | chlorococcoid                 | soredia | Lecidea    | absent      | ascomata without carbonized                                | spores not           | spores multi-       |           | orcinol tridepsides                 |

|                                                                    |           |                               |         |            |          |                                                            |                      |                     |                                                                    |
|--------------------------------------------------------------------|-----------|-------------------------------|---------|------------|----------|------------------------------------------------------------|----------------------|---------------------|--------------------------------------------------------------------|
| Vězda                                                              |           | and other green               |         |            |          | structures                                                 | pigmented            | celled              |                                                                    |
| <i>Stenocybe pullatula</i> (Ach.) Stein                            | crustose  | algae absent                  | absent  | stalked    | absent   | ascomata with carbonized structures                        | spores pigmented     | spores multi-celled | no substances                                                      |
| <i>Thelocarpon epibolum</i> Nyl.                                   | crustose  | chlorococcoid and other green | absent  | perithecia | pycnidia | ascomata with carbonized structures + ascomata with pruina | spores not pigmented | spores 1-celled     | pulvinic acid derivatives                                          |
| <i>Thelocarpon lichenicola</i> (Fuckel) Poelt & Hafellner          | crustose  | algae absent                  | absent  | Lecidea    | pycnidia | ascomata with carbonized structures + ascomata with pruina | spores not pigmented | spores 1-celled     | pulvinic acid derivatives                                          |
| <i>Thelotrema lepadinum</i> (Ach.) Ach.                            | crustose  | trentepohlia                  | absent  | Lecanora   | absent   | ascomata without carbonized structures                     | spores not pigmented | spores multi-celled | no substances                                                      |
| <i>Trapeliopsis flexuosa</i> (Fr.) Coppins & P. James              | crustose  | chlorococcoid and other green | soredia | Lecidea    | absent   | ascomata without carbonized structures                     | spores not pigmented | spores 1-celled     | orcinol tripeptides                                                |
| <i>Trapeliopsis glaucolepidea</i> (Nyl.) Gotth. Schneid.           | crustose  | chlorococcoid and other green | soredia | absent     | absent   | absent                                                     | absent               | absent              | no substances                                                      |
| <i>Trapeliopsis granulosa</i> (Hoffm.) Lumbsch                     | crustose  | chlorococcoid and other green | soredia | Lecidea    | absent   | ascomata without carbonized structures                     | spores not pigmented | spores 1-celled     | orcinol tripeptides                                                |
| <i>Trapeliopsis viridescens</i> (Schrad.) Coppins & P. James       | crustose  | chlorococcoid and other green | soredia | absent     | absent   | absent                                                     | absent               | absent              | orcinol tripeptides                                                |
| <i>Tuckermanopsis chlorophylla</i> (Willd.) Hale                   | foliose   | chlorococcoid and other green | soredia | absent     | pycnidia | absent                                                     | absent               | absent              | aliphatic acids                                                    |
| <i>Tuckermanopsis sepincola</i> (Ehrh.) Hale                       | foliose   | chlorococcoid and other green | absent  | Lecanora   | pycnidia | ascomata without carbonized structures                     | spores not pigmented | spores 1-celled     | aliphatic acids                                                    |
| <i>Usnea ceratina</i> Ach.                                         | fruticose | chlorococcoid and other green | isidia  | absent     | absent   | absent                                                     | absent               | absent              | β-orcinol depsides + usnic acid derivatives                        |
| <i>Usnea dasopoga</i> (Ach.) Nyl.                                  | fruticose | chlorococcoid and other green | isidia  | absent     | absent   | absent                                                     | absent               | absent              | β-orcinol depsidones + usnic acid derivatives                      |
| <i>Usnea florida</i> (L.) Weber ex F.H. Wigg.                      | fruticose | chlorococcoid and other green | soredia | absent     | absent   | absent                                                     | absent               | absent              | β-orcinol depsides + usnic acid derivatives                        |
| <i>Usnea fulvoreaegens</i> (Räsänen) Räsänen                       | fruticose | chlorococcoid and other green | soredia | absent     | absent   | absent                                                     | absent               | absent              | β-orcinol depsidones + β-orcinol depsides + usnic acid derivatives |
| <i>Usnea hirta</i> (L.) F. H. Wigg.                                | fruticose | chlorococcoid and other green | isidia  | absent     | absent   | absent                                                     | absent               | absent              | aliphatic acids + usnic acid derivatives                           |
| <i>Usnea wasmuthii</i> Räsänen                                     | fruticose | chlorococcoid and other green | soredia | absent     | absent   | absent                                                     | absent               | absent              | β-orcinol depsidones + β-orcinol depsides                          |
| <i>Varicellaria hemisphaerica</i> (Flörke) Schmitt & Lumbsch       | crustose  | chlorococcoid and other green | soredia | absent     | absent   | absent                                                     | absent               | absent              | orcinol depsides                                                   |
| <i>Violella fucata</i> (Stirt.) T. Sprib.                          | crustose  | chlorococcoid and other green | soredia | absent     | absent   | absent                                                     | absent               | absent              | β-orcinol depsidones + β-orcinol depsides                          |
| <i>Vulpicida pinastris</i> (Scop.) J.-E. Mattson & M. J. Lai       | foliose   | chlorococcoid and other green | soredia | absent     | absent   | absent                                                     | absent               | absent              | pulvinic acid derivatives + usnic acid derivatives + terpenoids    |
| <i>Xanthoria parietina</i> (L.) Th. Fr.                            | foliose   | chlorococcoid and other green | absent  | Lecanora   | pycnidia | ascomata without carbonized structures                     | spores not pigmented | spores 2-celled     | antraquinoses                                                      |
| <i>Xylopsora caradocensis</i> (Leight. ex Nyl.) Bendiksby & Timdal | crustose  | chlorococcoid and other green | absent  | Lecidea    | pycnidia | ascomata with carbonized structures                        | spores not pigmented | spores 2-celled     | no substances                                                      |
| <i>Zwackhia viridis</i> (Ach.) Poetsch & Schied.                   | crustose  | trentepohlia                  | absent  | lirella    | pycnidia | ascomata with carbonized structures                        | spores pigmented     | spores multi-celled | no substances                                                      |
